# Supplementary material for: Reduced graphene oxide composite aerogel prepared by europium-assisting radiation reduction as a broad-spectrum adsorbent for organic pollutants
Source: Royal Society of Chemistry journal article supplement (doi:10.1039/d2ta08576c), 2023-01-01
Supplement: d2ta08576c1.pdf [file d2ta08576c1.pdf]

## Supporting Information

### **Reduced graphene oxide composite aerogel prepared by europium-assisting radiation reduction as a broad-spectrum adsorbent for organic pollutants**

*Peng Zhang<sup>a</sup>, Yizhi Chen<sup>a</sup>, Hanqin Weng<sup>a,b,\*</sup>, Yusa Muroya<sup>b</sup>, Shinichi Yamashita<sup>c,d</sup>, Yinhua Zhao<sup>e</sup>,  
Mingzhang Lin<sup>a</sup>*

a. School of Nuclear Science and Technology, University of Science and Technology of China,  
Hefei, Anhui 230026, China

b. SANKEN (The Institute of Scientific and Industrial Research), Osaka University, 8-1 Mihogaoka,  
Ibaraki, Osaka 567-0047, Japan

c. Nuclear Professional School, School of Engineering, The University of Tokyo, 2-22 Shirakata-  
shirane, Tokai-mura, Naka-gun, Ibaraki 319-1188, Japan

d. Department of Nuclear Engineering and Management, School of Engineering, The University of  
Tokyo, 4-7-1 Hongo, Bunkyo-ku, Tokyo 113-8656, Japan

e. Instruments Center for Physical Science, University of Science and Technology of China, Hefei,  
Anhui 230026, China

\* To whom correspondence should be addressed. Email: [hanqinw@ustc.edu.cn](mailto:hanqinw@ustc.edu.cn) (H. Q. Weng)

## 1. Pulse radiolysis experiments

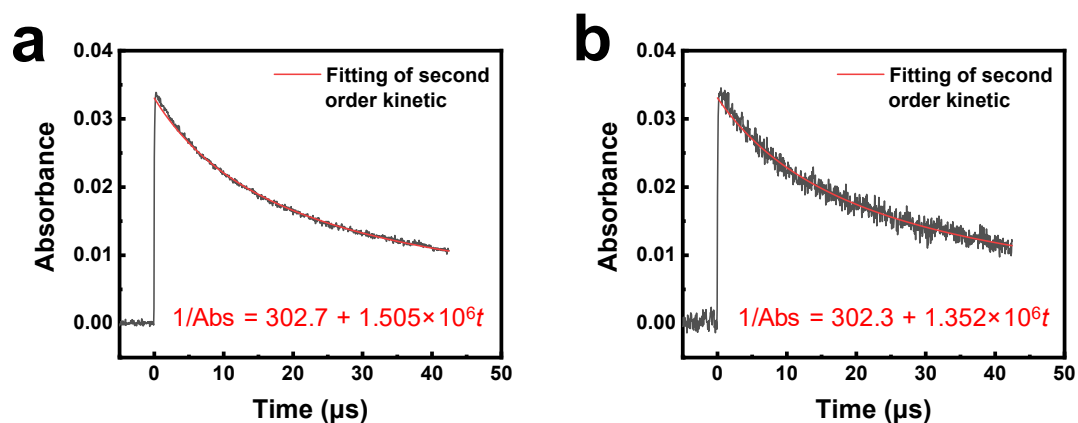

**Figure. S1** Decay curves of the absorbance for  $(\text{CH}_3)_2\dot{\text{C}}\text{OH}$  at 300 nm in isopropanol ( $0.2 \text{ mol L}^{-1}$ ) aqueous solution with (a) and without (b) the addition of GO ( $0.15 \text{ mg mL}^{-1}$ ). The absorbed dose in pulse radiolysis experiments was  $65 \text{ Gy pulse}^{-1}$ .

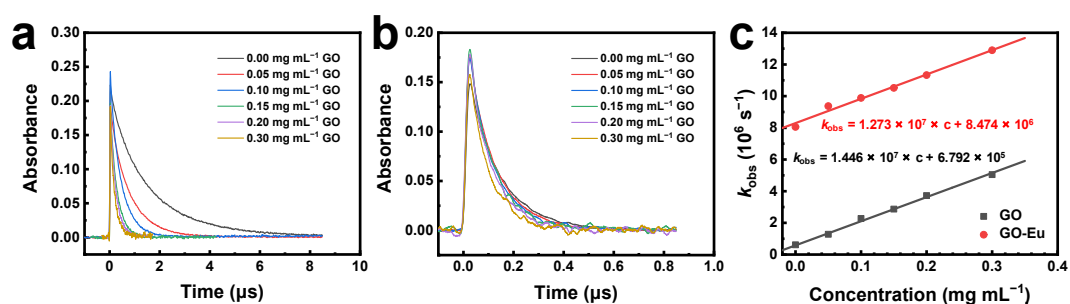

**Figure. S2** Decay curves of the absorbance for  $e_{\text{aq}}^-$  at 720 nm with (a) and without  $0.13 \text{ mmol L}^{-1}$  of  $\text{Eu}^{3+}$  (b). Apparent reaction rates between  $e_{\text{aq}}^-$  and GO (c). The aqueous dispersion contained  $0.2 \text{ mol L}^{-1}$  of isopropanol and different concentrations of GO. The absorbed dose in pulse radiolysis experiments was  $16 \text{ Gy pulse}^{-1}$ .

The rate constant between  $e_{aq}^-$  and GO was calculated as follows.

For a second-order reaction,

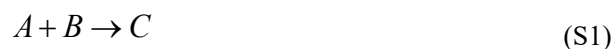

The reaction rate can be expressed as,

$$-\frac{d[A]}{dt} = k[A][B] \quad (S2)$$

where [A] and [B], whose units are both  $\text{mol} \cdot \text{L}^{-1}$ , are the concentrations of A and B respectively.  $k$  is the rate constant of the second-order reaction, whose unit is  $\text{L} \cdot \text{mol}^{-1} \cdot \text{s}^{-1}$ . When the concentration of B is much higher than that of A, the concentration of B almost remains constant during the reaction. Thus [A] decays according to a pseudo-first-order reaction kinetics. Then **Equation S2** is simplified to **Equation S3**.

$$-\frac{d[A]}{dt} = k'[B] \quad (S3)$$

where  $k' = k[B]$ . The unit of  $k'$  is  $\text{s}^{-1}$ .

The apparent reaction rate ( $k_{\text{obs}}$ ) of  $e_{aq}^-$  in **Figure. S2c** is the  $k'$  in **Equation S3**. The concentration of GO was much higher than that of  $e_{aq}^-$  produced by water radiolysis. Thus  $k$  between  $e_{aq}^-$  and GO was obtained by linear fitting of the  $k_{\text{obs}}$  vs. [GO] plots.

After addition of  $\text{Eu}^{3+}$ , the linear fitting displayed an intercept of  $8 \times 10^6 \text{ s}^{-1}$ , which was caused by the rapid reaction between  $e_{aq}^-$  and  $\text{Eu}^{3+}$ . The  $k$  between  $e_{aq}^-$  and  $\text{Eu}^{3+}$  was estimated to be  $6.5 \times 10^{10} \text{ L mol}^{-1} \text{ s}^{-1}$  ( $8.5 \times 10^6 \text{ s}^{-1} / 1.3 \times 10^{-4} \text{ mol L}^{-1}$ ).

## 2. $\text{Eu}^{3+}$ -induced pre-assembly of GO

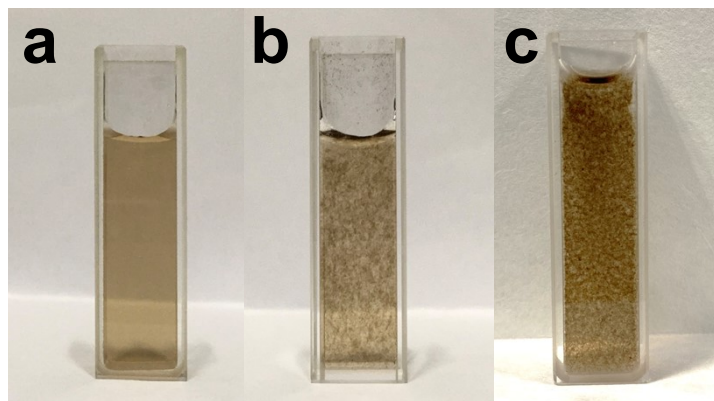

**Figure. S3.** Photographs of GO dispersion (a), GO dispersion with addition of  $\text{Eu}^{3+}$  at pH 2 (b) and 6 (c).

## 3. Characterization of pristine GO

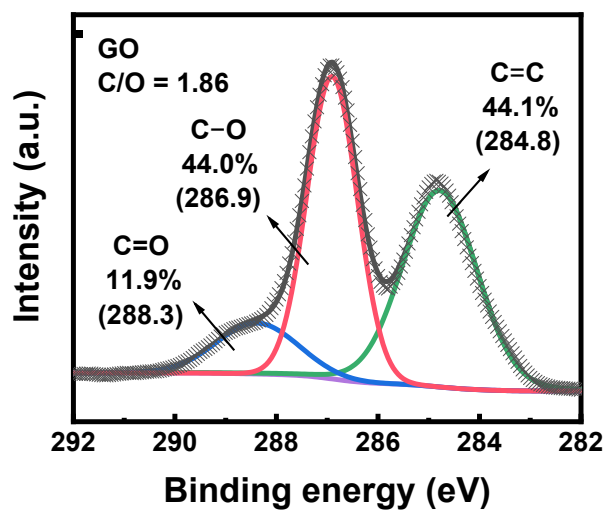

**Figure. S4** XPS C 1s spectrum of GO.

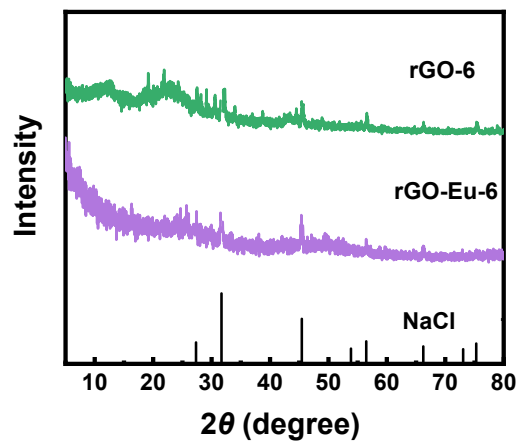

**Figure. S5** XRD patterns of rGO-6 and rGO-Eu-6, diffraction peaks of NaCl (JCPDS Card no. 05-0628).

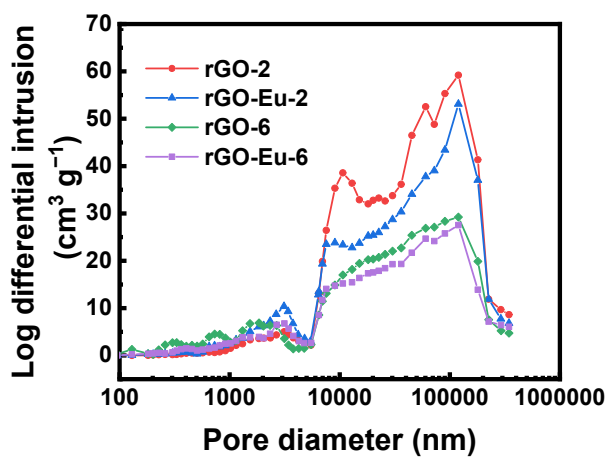

**Figure. S6** Pore size distributions of rGO-2, rGO-Eu-2, rGO-6, and rGO-Eu-6 measured by mercury intrusion porosimetry.

#### 4. Comparison in the adsorption performance

**Table S1.** Comparison in the maximum adsorption capacities ( $q_m$ ) of organic pollutants on different adsorbents.

| Adsorbents                                                                | $q_m$ for organic solvents<br>(g g <sup>-1</sup> ) | $q_m$ for organic dyes<br>(mg g <sup>-1</sup> ) | Ref.         |
|---------------------------------------------------------------------------|----------------------------------------------------|-------------------------------------------------|--------------|
| graphene sponge                                                           | 20–86                                              | –                                               | [1]          |
| reduced graphene oxide foam                                               | 70–122                                             | –                                               | [2]          |
| Freeze-dried CNF/graphene                                                 | 44–265                                             | –                                               | [3]          |
| CdS/RGO aerogel                                                           | 122–298                                            | –                                               | [4]          |
| Cyclodextrin/graphene oxide aerogel                                       | –                                                  | 186.2 (methyl orange)                           | [5]          |
| Functionalized graphene oxide aerogel                                     | –                                                  | 202.8 (methyl orange)                           | [6]          |
| Carbon nanotubes and cellulose nanofiber<br>incorporated graphene aerogel | –                                                  | 51.6 (methyl orange)<br>101.0 (rhodamine 6G)    | [7]          |
| Cellulose/graphene oxide composite aerogel                                | –                                                  | 68 (methylene B)                                | [8]          |
| Layered double hydroxides-assembled<br>graphene oxide aerogel             | –                                                  | 96–125 (methylene B)                            | [9]          |
| rGO-Eu-2 aerogel                                                          | 81–395                                             | 1173.4 (eriochrome black T)                     | This<br>work |
|                                                                           |                                                    | 230.4 (methyl orange)                           |              |
|                                                                           |                                                    | 906.8 (malachite green)                         |              |
|                                                                           |                                                    | 173.7 (rhodamine 6G)                            |              |
|                                                                           |                                                    | 206.8 (methylene B)                             |              |
| rGO-Eu-6 aerogel                                                          | 12–25                                              | 1572.5 (eriochrome black T)                     | This<br>work |
|                                                                           |                                                    | 312.6 (methyl orange)                           |              |
|                                                                           |                                                    | 1367.6 (malachite green)                        |              |
|                                                                           |                                                    | 160.9 (rhodamine 6G)                            |              |
|                                                                           |                                                    | 95.4 (methylene B)                              |              |

## 5. Solid-state excitation and emission spectra of rGO-Eu-2

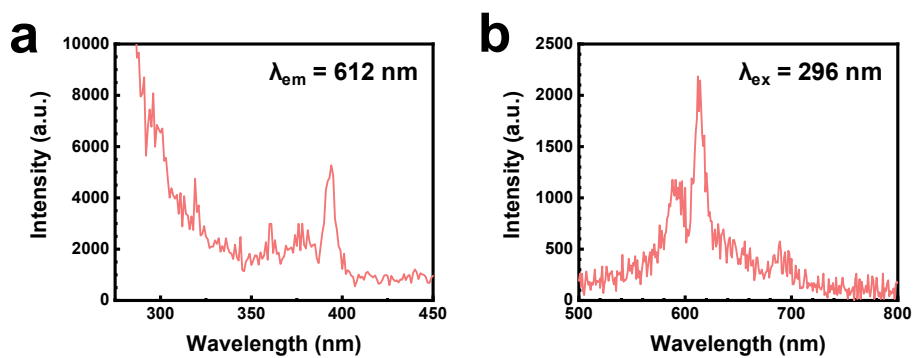

Figure. S7. Solid-state excitation (a) and emission (b) spectra of rGO-Eu-2.

## 6. UV-vis absorption spectra of different organic solvents

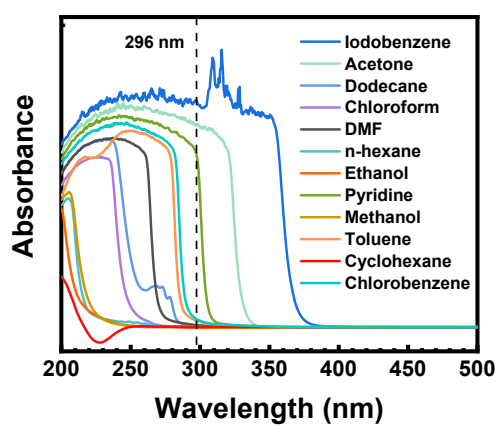

Figure. S8. UV-vis absorption spectra of different organic solvents.

## 7. Adsorption performance for anionic dyes

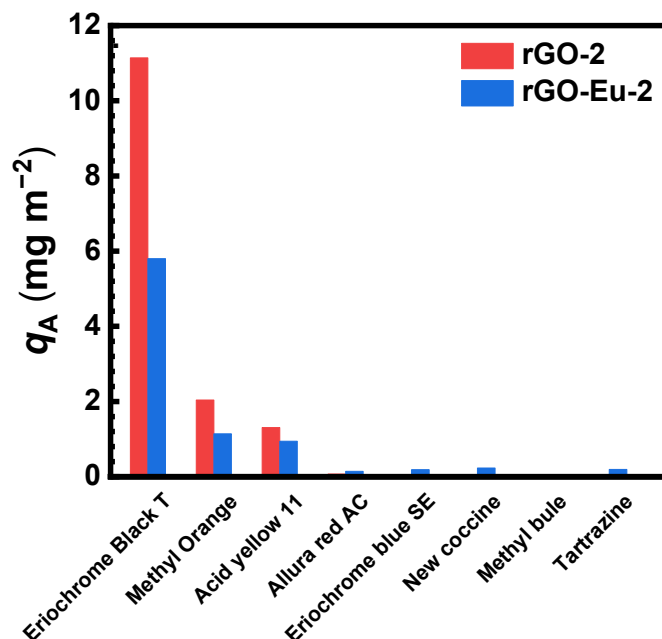

**Figure. S9** Adsorption amounts of anionic dyes on per unit area of rGO-2 and rGO-Eu-2 aerogels.

## 8. Calculation of Eu contents in rGO-Eu aerogels

The contents of Eu in aerogels were obtained according the concentration of Eu in dispersion before and after irradiation. The contents were calculated by the following **Equation S4**,

$$Content = \frac{(c_0 - c_e) \times V}{m} \quad (\text{S4})$$

where  $c_0$  ( $\text{mg L}^{-1}$ ) and  $c_e$  ( $\text{mg L}^{-1}$ ) are the concentrations of Eu in dispersion before and after irradiation, respectively.  $m$  (g) and  $V$  (L) are the weight of GO and the volume of dispersion, respectively. For determining the concentration of Eu after irradiation ( $c_e$ ), supernate of irradiated dispersion was obtained by centrifugation (10000 rpm, 5 min). Then Eu concentration of supernate was determined using an inductively coupled plasma optical emission spectrometer (ICP-OES, PerkinElmer Optima 7300DV).



## Reference

- [1] H. Bi, X. Xie, K. Yin, Y. Zhou, S. Wan, L. He, F. Xu, F. Banhart, L. Sun, R.S. Ruoff, Spongy graphene as a highly efficient and recyclable sorbent for oils and organic solvents, *Adv Funct Mater* 22(21) (2012) 4421-4425. <https://doi.org/10.1002/adfm.201200888>.
- [2] Y. He, Y. Liu, T. Wu, J. Ma, X. Wang, Q. Gong, W. Kong, F. Xing, Y. Liu, J. Gao, An environmentally friendly method for the fabrication of reduced graphene oxide foam with a super oil absorption capacity, *J Hazard Mater* 260 (2013) 796-805. <https://doi.org/10.1016/j.jhazmat.2013.06.042>.
- [3] X. Yao, W. Yu, X. Xu, F. Chen, Q. Fu, Amphiphilic, ultralight, and multifunctional graphene/nanofibrillated cellulose aerogel achieved by cation-induced gelation and chemical reduction, *Nanoscale* 7(9) (2015) 3959-3964. <https://doi.org/10.1039/c4nr07402e>.
- [4] R. Xu, W. Liu, J. Cai, Z. Li, Robust RGO composite aerogels with high adsorption capabilities for organic pollutants in water, *Sep Purif Technol* 257 (2021) 117876. <https://doi.org/10.1016/j.seppur.2020.117876>.
- [5] Z.-J. Nie, Q.-F. Guo, H. Xia, M.-M. Song, Z.-J. Qiu, S.-T. Fan, Z.-H. Chen, S.-X. Zhang, S. Zhang, B.-J. Li, Cyclodextrin self-assembled graphene oxide aerogel microspheres as broad-spectrum adsorbent for removing dyes and organic micropollutants from water, *J Environ Chem Eng* 9(2) (2021) 104749.
- [6] J. Xu, P. Du, W. Bi, G. Yao, S. Li, H. Liu, Graphene oxide aerogels co-functionalized with polydopamine and polyethylenimine for the adsorption of anionic dyes and organic solvents, *Chem Eng Res Des* 154 (2020) 192-202.
- [7] T. Shimizu, K.K.H. De Silva, M. Hara, M. Yoshimura, Facile synthesis of carbon nanotubes and cellulose nanofiber incorporated graphene aerogels for selective organic dye adsorption, *Appl Surf Sci*

600 (2022) 154098.

[8] Fang, Ren, Zhen, Li, Wen-Zhen, Tan, Xiao-Hui, Liu, Zhen-Feng, Sun, Facile preparation of 3D regenerated cellulose/graphene oxide composite aerogel with high-efficiency adsorption towards methylene blue, *J Colloid Interf Sci* (2018) <https://doi.org/10.1016/j.jcis.2018.07.101>.

[9] Q. Fang, B. Chen, Self-assembly of graphene oxide aerogels by layered double hydroxides cross-linking and their application in water purification, *J Mater Chem A* 2(23) (2014) 8941-8951. <https://doi.org/10.1039/C4TA00321G>.
